# Supplementary material for: Robotic versus laparoscopic heller myotomy for esophageal achalasia: an updated systematic review and meta-analysis
Source: Springer Nature journal article supplement (doi:10.1007/s00423-025-03648-1), 2025-02-17
Supplement: MOESM2 [file 423_2025_3648_MOESM2_ESM.pdf]

| Certainty assessment |              |              |               |              |             |                      | № of patients |     | Effect            |                   | Certainty | Importance |
|----------------------|--------------|--------------|---------------|--------------|-------------|----------------------|---------------|-----|-------------------|-------------------|-----------|------------|
| № of studies         | Study design | Risk of bias | Inconsistency | Indirectness | Imprecision | Other considerations | RHM           | LHM | Relative (95% CI) | Absolute (95% CI) |           |            |

#### Esophageal perforation

|    |                        |         |             |             |         |                                                                         |                |                  |                        |                                               |                  |          |
|----|------------------------|---------|-------------|-------------|---------|-------------------------------------------------------------------------|----------------|------------------|------------------------|-----------------------------------------------|------------------|----------|
| 14 | non-randomised studies | serious | not serious | not serious | serious | all plausible residual confounding would reduce the demonstrated effect | 43/2503 (1.7%) | 216/10459 (2.1%) | RR 0.31 (0.16 to 0.59) | 14 fewer per 1.000 (from 17 fewer to 8 fewer) | ⊕⊕⊕○<br>Moderate | CRITICAL |
|----|------------------------|---------|-------------|-------------|---------|-------------------------------------------------------------------------|----------------|------------------|------------------------|-----------------------------------------------|------------------|----------|

#### Dysphagia requiring reintervention or endoscopic procedures

|   |                        |         |         |             |         |                                                                         |               |                |                        |                                                |             |          |
|---|------------------------|---------|---------|-------------|---------|-------------------------------------------------------------------------|---------------|----------------|------------------------|------------------------------------------------|-------------|----------|
| 7 | non-randomised studies | serious | serious | not serious | serious | all plausible residual confounding would reduce the demonstrated effect | 21/460 (4.6%) | 81/584 (13.9%) | RR 0.47 (0.20 to 1.09) | 74 fewer per 1.000 (from 111 fewer to 12 more) | ⊕⊕○○<br>Low | CRITICAL |
|---|------------------------|---------|---------|-------------|---------|-------------------------------------------------------------------------|---------------|----------------|------------------------|------------------------------------------------|-------------|----------|

#### Post operative Eckardt score

|   |                        |         |         |         |         |                                                                         |     |     |   |                                               |                  |          |
|---|------------------------|---------|---------|---------|---------|-------------------------------------------------------------------------|-----|-----|---|-----------------------------------------------|------------------|----------|
| 4 | non-randomised studies | serious | serious | serious | serious | all plausible residual confounding would reduce the demonstrated effect | 207 | 161 | - | SMD 0.42 SD lower (0.94 lower to 0.11 higher) | ⊕○○○<br>Very low | CRITICAL |
|---|------------------------|---------|---------|---------|---------|-------------------------------------------------------------------------|-----|-----|---|-----------------------------------------------|------------------|----------|

#### Conversion to open

|    |                        |             |             |             |             |      |              |               |                        |                                              |              |          |
|----|------------------------|-------------|-------------|-------------|-------------|------|--------------|---------------|------------------------|----------------------------------------------|--------------|----------|
| 11 | non-randomised studies | not serious | not serious | not serious | not serious | none | 0/429 (0.0%) | 10/465 (2.2%) | RR 0.36 (0.13 to 1.05) | 14 fewer per 1.000 (from 19 fewer to 1 more) | ⊕⊕⊕⊕<br>High | CRITICAL |
|----|------------------------|-------------|-------------|-------------|-------------|------|--------------|---------------|------------------------|----------------------------------------------|--------------|----------|

| Certainty assessment |              |              |               |              |             |                      | № of patients |     | Effect            |                   | Certainty | Importance |
|----------------------|--------------|--------------|---------------|--------------|-------------|----------------------|---------------|-----|-------------------|-------------------|-----------|------------|
| № of studies         | Study design | Risk of bias | Inconsistency | Indirectness | Imprecision | Other considerations | RHM           | LHM | Relative (95% CI) | Absolute (95% CI) |           |            |

#### Intraoperative blood loss

|   |                        |             |             |             |             |      |     |     |   |                                                                 |              |           |
|---|------------------------|-------------|-------------|-------------|-------------|------|-----|-----|---|-----------------------------------------------------------------|--------------|-----------|
| 5 | non-randomised studies | not serious | not serious | not serious | not serious | none | 216 | 179 | - | SMD<br>0.46 SD<br>lower<br>(0.98<br>lower to<br>0.08<br>higher) | ⊕⊕⊕⊕<br>High | IMPORTANT |
|---|------------------------|-------------|-------------|-------------|-------------|------|-----|-----|---|-----------------------------------------------------------------|--------------|-----------|

#### Operative time

|    |                        |         |         |         |         |                                                                                                |     |     |   |                                                                |             |          |
|----|------------------------|---------|---------|---------|---------|------------------------------------------------------------------------------------------------|-----|-----|---|----------------------------------------------------------------|-------------|----------|
| 12 | non-randomised studies | serious | serious | serious | serious | all plausible residual confounding would reduce the demonstrated effect dose response gradient | 599 | 742 | - | SMD<br>0.34 SD<br>lower<br>(1.9<br>lower to<br>1.21<br>higher) | ⊕⊕○○<br>Low | CRITICAL |
|----|------------------------|---------|---------|---------|---------|------------------------------------------------------------------------------------------------|-----|-----|---|----------------------------------------------------------------|-------------|----------|

#### HLOS

|    |                        |         |         |         |         |                                                                                                             |      |       |   |                                                                 |                  |          |
|----|------------------------|---------|---------|---------|---------|-------------------------------------------------------------------------------------------------------------|------|-------|---|-----------------------------------------------------------------|------------------|----------|
| 12 | non-randomised studies | serious | serious | serious | serious | publication bias strongly suspected all plausible residual confounding would reduce the demonstrated effect | 2448 | 10337 | - | SMD<br>0.25 SD<br>lower<br>(0.43<br>lower to<br>0.06<br>higher) | ⊕○○○<br>Very low | CRITICAL |
|----|------------------------|---------|---------|---------|---------|-------------------------------------------------------------------------------------------------------------|------|-------|---|-----------------------------------------------------------------|------------------|----------|

**Supplementary Table 2.** Grading of Recommendations, Assessment, Development, and Evaluation framework (GRADE) stratified for different study outcomes. CI: confidence interval; RR: risk ratio; SMD: standardised mean difference
